# Supplementary material for: Physical and mental functioning trajectory classes among older adults and their association with specialized healthcare use
Source: Springer Nature journal article supplement (doi:10.1186/s12877-023-04157-w), 2023-07-21
Supplement: MOESM1 [file 25831064]

# **Physical and mental functioning trajectory classes among older adults and their association with specialized healthcare use**

## **Supplementary Material**

**Supplementary Table 1.** Baseline characteristics by physical functioning trajectory classes among men and women

**Supplementary Table 2.** Baseline characteristics by mental functioning trajectory classes among men and women

**Supplementary Table 3.** Incidence rate ratios (IRRs) for healthcare service use across sex and physical functioning trajectory classes with membership probability of 0.85 or higher.

**Supplementary Table 4.** Incidence rate ratios (IRRs) for healthcare service use across sex and mental functioning trajectory classes with membership probability of 0.85 or higher.

**Supplementary Figure 1.** Selection of the study participants.

**Supplementary Figure 2.** Observed (gray line), model-expectation (black line) and average (blue line) model-based trajectories for physical component score (PCS) in the intermediate and high declining classes among men and women.

**Supplementary Figure 3.** Observed (gray line), model-expectation (black line) and average (blue line) model-based trajectories for mental component score (MCS) in the intermediate and high stable classes among men and women.

Supplementary Table 1. Baseline characteristics by physical functioning trajectory classes among men and women.

|                                    | Men                                                |             |                                            |             | Women                                              |             |                                            |             |
|------------------------------------|----------------------------------------------------|-------------|--------------------------------------------|-------------|----------------------------------------------------|-------------|--------------------------------------------|-------------|
|                                    | Intermediate physical functioning trajectory class |             | High physical functioning trajectory class |             | Intermediate physical functioning trajectory class |             | High physical functioning trajectory class |             |
|                                    | n                                                  | Mean (SD)   | n                                          | Mean (SD)   | n                                                  | Mean (SD)   | n                                          | Mean (SD)   |
| Age                                | 317                                                | 61.7 (2.9)  | 604                                        | 61.5 (2.8)  | 476                                                | 62.0 (3.2)  | 594                                        | 61.2 (2.9)  |
| Education                          |                                                    |             |                                            |             |                                                    |             |                                            |             |
| Basic or less or unknown, %        | 120                                                | 37.9        | 153                                        | 25.3        | 213                                                | 44.7        | 223                                        | 37.5        |
| Upper secondary, %                 | 96                                                 | 30.3        | 129                                        | 21.4        | 134                                                | 28.2        | 152                                        | 25.6        |
| Lower level tertiary, %            | 77                                                 | 24.3        | 195                                        | 32.3        | 100                                                | 21.0        | 156                                        | 26.3        |
| Upper level tertiary, %            | 24                                                 | 7.6         | 127                                        | 21.0        | 29                                                 | 6.1         | 63                                         | 10.6        |
| Chronic diseases                   |                                                    |             |                                            |             |                                                    |             |                                            |             |
| No diseases                        | 176                                                | 55.5        | 472                                        | 78.1        | 251                                                | 52.7        | 471                                        | 79.3        |
| 1 chronic disease                  | 84                                                 | 30.3        | 101                                        | 21.4        | 141                                                | 29.6        | 104                                        | 17.5        |
| 2 or more chronic diseases         | 57                                                 | 18.0        | 31                                         | 5.1         | 84                                                 | 17.6        | 19                                         | 3.2         |
| Diseases                           |                                                    |             |                                            |             |                                                    |             |                                            |             |
| Cardiovascular disease, %          | 177                                                | 56.0        | 209                                        | 34.7        | 232                                                | 48.8        | 174                                        | 29.4        |
| Diabetes, %                        | 51                                                 | 16.1        | 33                                         | 5.5         | 45                                                 | 9.5         | 18                                         | 3.0         |
| Asthma/COPD, %                     | 54                                                 | 17.1        | 45                                         | 7.5         | 94                                                 | 19.8        | 52                                         | 8.8         |
| Depression, %                      | 48                                                 | 15.2        | 47                                         | 7.1         | 100                                                | 21.1        | 53                                         | 9.0         |
| Smoking                            |                                                    |             |                                            |             |                                                    |             |                                            |             |
| Never, %                           | 67                                                 | 21.3        | 178                                        | 29.7        | 264                                                | 55.8        | 325                                        | 55.4        |
| Quitted earlier, %                 | 141                                                | 44.8        | 278                                        | 46.3        | 107                                                | 22.6        | 143                                        | 24.4        |
| Current smoker, %                  | 107                                                | 34.0        | 144                                        | 24.0        | 102                                                | 21.6        | 119                                        | 20.3        |
| Alcohol use                        |                                                    |             |                                            |             |                                                    |             |                                            |             |
| Does not use, %                    | 26                                                 | 8.3         | 43                                         | 7.2         | 43                                                 | 9.1         | 34                                         | 5.8         |
| 2 times/month at most, %           | 100                                                | 31.7        | 155                                        | 25.8        | 263                                                | 55.7        | 302                                        | 51.1        |
| 3 times/month or more              | 189                                                | 60.0        | 403                                        | 67.1        | 166                                                | 35.2        | 255                                        | 43.1        |
| Physical activity (MET hours/week) | 303                                                | 42.7 (36.0) | 597                                        | 46.5 (37.2) | 466                                                | 47.3 (47.4) | 589                                        | 46.3 (35.4) |
| Self-reported physical condition   |                                                    |             |                                            |             |                                                    |             |                                            |             |
| Very good                          | 2                                                  | 0.6         | 43                                         | 7.1         | 5                                                  | 1.1         | 34                                         | 5.7         |
| Fairly good                        | 47                                                 | 14.8        | 271                                        | 44.9        | 89                                                 | 18.7        | 270                                        | 45.5        |
| Satisfactory                       | 140                                                | 44.2        | 239                                        | 39.6        | 205                                                | 43.1        | 232                                        | 39.1        |
| Quite poor                         | 113                                                | 35.8        | 48                                         | 7.9         | 149                                                | 31.3        | 55                                         | 9.3         |
| Very poor                          | 15                                                 | 4.7         | 3                                          | 0.5         | 28                                                 | 5.9         | 3                                          | 0.5         |
| Grip strength                      | 314                                                | 38.8 (9.5)  | 603                                        | 41.0 (9.4)  | 415                                                | 21.9 (6.4)  | 534                                        | 23.7 (6.1)  |
| BDI                                | 315                                                | 7.8 (5.9)   | 603                                        | 4.2 (4.2)   | 460                                                | 8.8 (6.4)   | 586                                        | 5.5 (5.3)   |

SD = standard deviation; MET = metabolic equivalent; BDI = Beck's Depression Inventory

Supplementary Table 2. Baseline characteristics by mental functioning trajectory classes among men and women

|                                    | Men                                              |             |                                          |             | Women                                            |             |                                          |             |
|------------------------------------|--------------------------------------------------|-------------|------------------------------------------|-------------|--------------------------------------------------|-------------|------------------------------------------|-------------|
|                                    | Intermediate mental functioning trajectory class |             | High mental functioning trajectory class |             | Intermediate mental functioning trajectory class |             | High mental functioning trajectory class |             |
|                                    | n                                                | Mean (SD)   | n                                        | Mean (SD)   | n                                                | Mean (SD)   | n                                        | Mean (SD)   |
| Age                                | 207                                              | 61.8 (2.7)  | 714                                      | 61.5 (2.8)  | 365                                              | 61.9 (3.1)  | 705                                      | 61.3 (3.0)  |
| Education                          |                                                  |             |                                          |             |                                                  |             |                                          |             |
| Basic or less or unknown, %        | 68                                               | 32.9        | 205                                      | 28.7        | 154                                              | 42.2        | 282                                      | 40.0        |
| Upper secondary, %                 | 57                                               | 27.5        | 168                                      | 23.5        | 97                                               | 26.6        | 189                                      | 26.8        |
| Lower level tertiary, %            | 49                                               | 23.7        | 223                                      | 31.2        | 89                                               | 24.4        | 167                                      | 23.7        |
| Upper level tertiary, %            | 33                                               | 15.9        | 118                                      | 16.5        | 25                                               | 6.8         | 67                                       | 9.5         |
| Chronic diseases                   |                                                  |             |                                          |             |                                                  |             |                                          |             |
| No diseases                        | 124                                              | 59.9        | 524                                      | 73.4        | 202                                              | 55.3        | 520                                      | 73.8        |
| 1 chronic disease                  | 53                                               | 25.6        | 132                                      | 18.5        | 106                                              | 29.0        | 139                                      | 19.7        |
| 2 or more chronic diseases         | 30                                               | 14.5        | 58                                       | 8.1         | 57                                               | 15.6        | 46                                       | 6.5         |
| Diseases                           |                                                  |             |                                          |             |                                                  |             |                                          |             |
| Cardiovascular disease, %          | 101                                              | 49.3        | 285                                      | 39.9        | 145                                              | 39.9        | 261                                      | 37.1        |
| Diabetes, %                        | 24                                               | 11.7        | 60                                       | 8.4         | 23                                               | 6.3         | 40                                       | 5.7         |
| Asthma/COPD, %                     | 19                                               | 9.3         | 80                                       | 11.2        | 57                                               | 15.7        | 89                                       | 12.6        |
| Depression, %                      | 47                                               | 22.9        | 44                                       | 6.2         | 98                                               | 27.0        | 55                                       | 7.8         |
| Smoking                            |                                                  |             |                                          |             |                                                  |             |                                          |             |
| Never, %                           | 50                                               | 24.5        | 195                                      | 27.4        | 202                                              | 55.8        | 387                                      | 55.4        |
| Quitted earlier, %                 | 86                                               | 42.2        | 333                                      | 46.8        | 83                                               | 22.9        | 167                                      | 23.9        |
| Current smoker, %                  | 68                                               | 33.3        | 183                                      | 25.7        | 77                                               | 21.3        | 144                                      | 20.6        |
| Alcohol use                        |                                                  |             |                                          |             |                                                  |             |                                          |             |
| Does not use, %                    | 14                                               | 6.8         | 55                                       | 7.7         | 34                                               | 9.4         | 43                                       | 6.1         |
| 2 times/month at most, %           | 60                                               | 29.3        | 195                                      | 27.4        | 186                                              | 51.4        | 379                                      | 54.1        |
| 3 times/month or more              | 131                                              | 63.9        | 461                                      | 64.8        | 142                                              | 39.2        | 279                                      | 39.8        |
| Physical activity (MET hours/week) | 199                                              | 45.7 (38.2) | 701                                      | 45.1 (36.5) | 358                                              | 47.9 (43.0) | 697                                      | 46.1 (40.1) |
| Self-reported physical condition   |                                                  |             |                                          |             |                                                  |             |                                          |             |
| Very good                          | 8                                                | 3.9         | 37                                       | 5.2         | 8                                                | 2.2         | 31                                       | 4.4         |
| Fairly good                        | 45                                               | 21.7        | 273                                      | 38.2        | 98                                               | 26.8        | 261                                      | 37.0        |
| Satisfactory                       | 86                                               | 41.5        | 293                                      | 41.0        | 148                                              | 40.5        | 289                                      | 41.0        |
| Quite poor                         | 58                                               | 28.0        | 103                                      | 14.4        | 96                                               | 26.3        | 108                                      | 15.3        |
| Very poor                          | 10                                               | 4.8         | 8                                        | 1.1         | 15                                               | 4.1         | 16                                       | 2.3         |
| Grip strength                      | 206                                              | 39.2 (10.0) | 711                                      | 40.5 (9.3)  | 330                                              | 22.1 (6.2)  | 619                                      | 23.4 (6.3)  |
| BDI                                | 207                                              | 9.6 (6.5)   | 711                                      | 4.2 (3.9)   | 360                                              | 10.8 (7.1)  | 686                                      | 5.0 (4.2)   |

SD = standard deviation; MET = metabolic equivalent; BDI = Beck's Depression Inventory

Supplementary Table 3. Incidence rate ratios (IRRs) for healthcare service use across sex and physical functioning trajectory classes with membership probability of 0.85 or higher.

|                                   | Men                                  |                                      | Women                                |                                      |
|-----------------------------------|--------------------------------------|--------------------------------------|--------------------------------------|--------------------------------------|
|                                   | Model 1 <sup>a</sup><br>IRR (95% CI) | Model 2 <sup>b</sup><br>IRR (95% CI) | Model 1 <sup>a</sup><br>IRR (95% CI) | Model 2 <sup>b</sup><br>IRR (95% CI) |
| <b>Emergency visit</b>            |                                      |                                      |                                      |                                      |
| High declining                    | Ref.                                 | Ref.                                 | Ref.                                 | Ref.                                 |
| Intermediate declining            | 2.15 (1.77, 2.61) <sup>***</sup>     | 1.75 (1.42, 2.17) <sup>***</sup>     | 2.38 (1.97, 2.88) <sup>***</sup>     | 2.06 (1.69, 2.52) <sup>***</sup>     |
| <b>First outpatient visit</b>     |                                      |                                      |                                      |                                      |
| High declining                    | Ref.                                 | Ref.                                 | Ref.                                 | Ref.                                 |
| Intermediate declining            | 1.80 (1.58, 2.05) <sup>***</sup>     | 1.67 (1.46, 1.92) <sup>***</sup>     | 2.07 (1.82, 2.36) <sup>***</sup>     | 1.90 (1.66, 2.17) <sup>***</sup>     |
| <b>Follow-up outpatient visit</b> |                                      |                                      |                                      |                                      |
| High declining                    | Ref.                                 | Ref.                                 | Ref.                                 | Ref.                                 |
| Intermediate declining            | 2.20 (1.61, 3.00) <sup>***</sup>     | 2.01 (1.52, 2.66) <sup>***</sup>     | 2.34 (1.87, 2.91) <sup>***</sup>     | 2.12 (1.69, 2.64) <sup>***</sup>     |
| <b>Hospital days</b>              |                                      |                                      |                                      |                                      |
| High declining                    | Ref.                                 | Ref.                                 | Ref.                                 | Ref.                                 |
| Intermediate declining            | 2.37 (1.67, 3.36) <sup>***</sup>     | 1.94 (1.34, 2.80) <sup>***</sup>     | 3.85 (2.42, 6.10) <sup>***</sup>     | 2.86 (1.98, 4.12) <sup>***</sup>     |

<sup>a</sup> Adjusted for age, n = 669 men and n = 676 women

<sup>b</sup> Adjusted for age, physical activity, education, number of chronic diseases, smoking, and alcohol consumption, n = 649

men and n = 656 women

CI = confidence interval

\* = p < 0.05, \*\* = p < 0.01, \*\*\* = p < 0.001

Supplementary Table 4. Incidence rate ratios (IRRs) for healthcare service use across sex and mental functioning trajectory classes with membership probability of 0.85 or higher.

|                                   | Men                                  |                                      | Women                                |                                      |
|-----------------------------------|--------------------------------------|--------------------------------------|--------------------------------------|--------------------------------------|
|                                   | Model 1 <sup>a</sup><br>IRR (95% CI) | Model 2 <sup>b</sup><br>IRR (95% CI) | Model 1 <sup>a</sup><br>IRR (95% CI) | Model 2 <sup>b</sup><br>IRR (95% CI) |
| <b>Emergency visit</b>            |                                      |                                      |                                      |                                      |
| High declining                    | Ref.                                 | Ref.                                 | Ref.                                 | Ref.                                 |
| Intermediate declining            | 1.28 (1.03, 1.61)*                   | 1.08 (0.89, 1.31)                    | 1.26 (1.03, 1.55)*                   | 1.09 (0.89, 1.32)                    |
| <b>First outpatient visit</b>     |                                      |                                      |                                      |                                      |
| High declining                    | Ref.                                 | Ref.                                 | Ref.                                 | Ref.                                 |
| Intermediate declining            | 1.23 (1.06, 1.42)**                  | 1.17 (1.01, 1.35)*                   | 1.29 (1.15, 1.46)***                 | 1.20 (1.07, 1.36)**                  |
| <b>Follow-up outpatient visit</b> |                                      |                                      |                                      |                                      |
| High declining                    | Ref.                                 | Ref.                                 | Ref.                                 | Ref.                                 |
| Intermediate declining            | 1.14 (0.85, 1.51)                    | 1.15 (0.90, 1.46)                    | 1.31 (1.05, 1.62)*                   | 1.14 (0.91, 1.42)                    |
| <b>Hospital days</b>              |                                      |                                      |                                      |                                      |
| High declining                    | Ref.                                 | Ref.                                 | Ref.                                 | Ref.                                 |
| Intermediate declining            | 1.74 (1.20, 2.51)**                  | 1.41 (0.92, 2.15)                    | 1.34 (0.94, 1.93)                    | 0.95 (0.69, 1.33)                    |

<sup>a</sup> Adjusted for age, n = 767 men and n = 753 women

<sup>b</sup> Adjusted for age, physical activity, education, number of chronic diseases, smoking, and alcohol consumption, n = 745

men and n = 737 women

CI = confidence interval

\* = p < 0.05, \*\* = p < 0.01, \*\*\* = p < 0.001

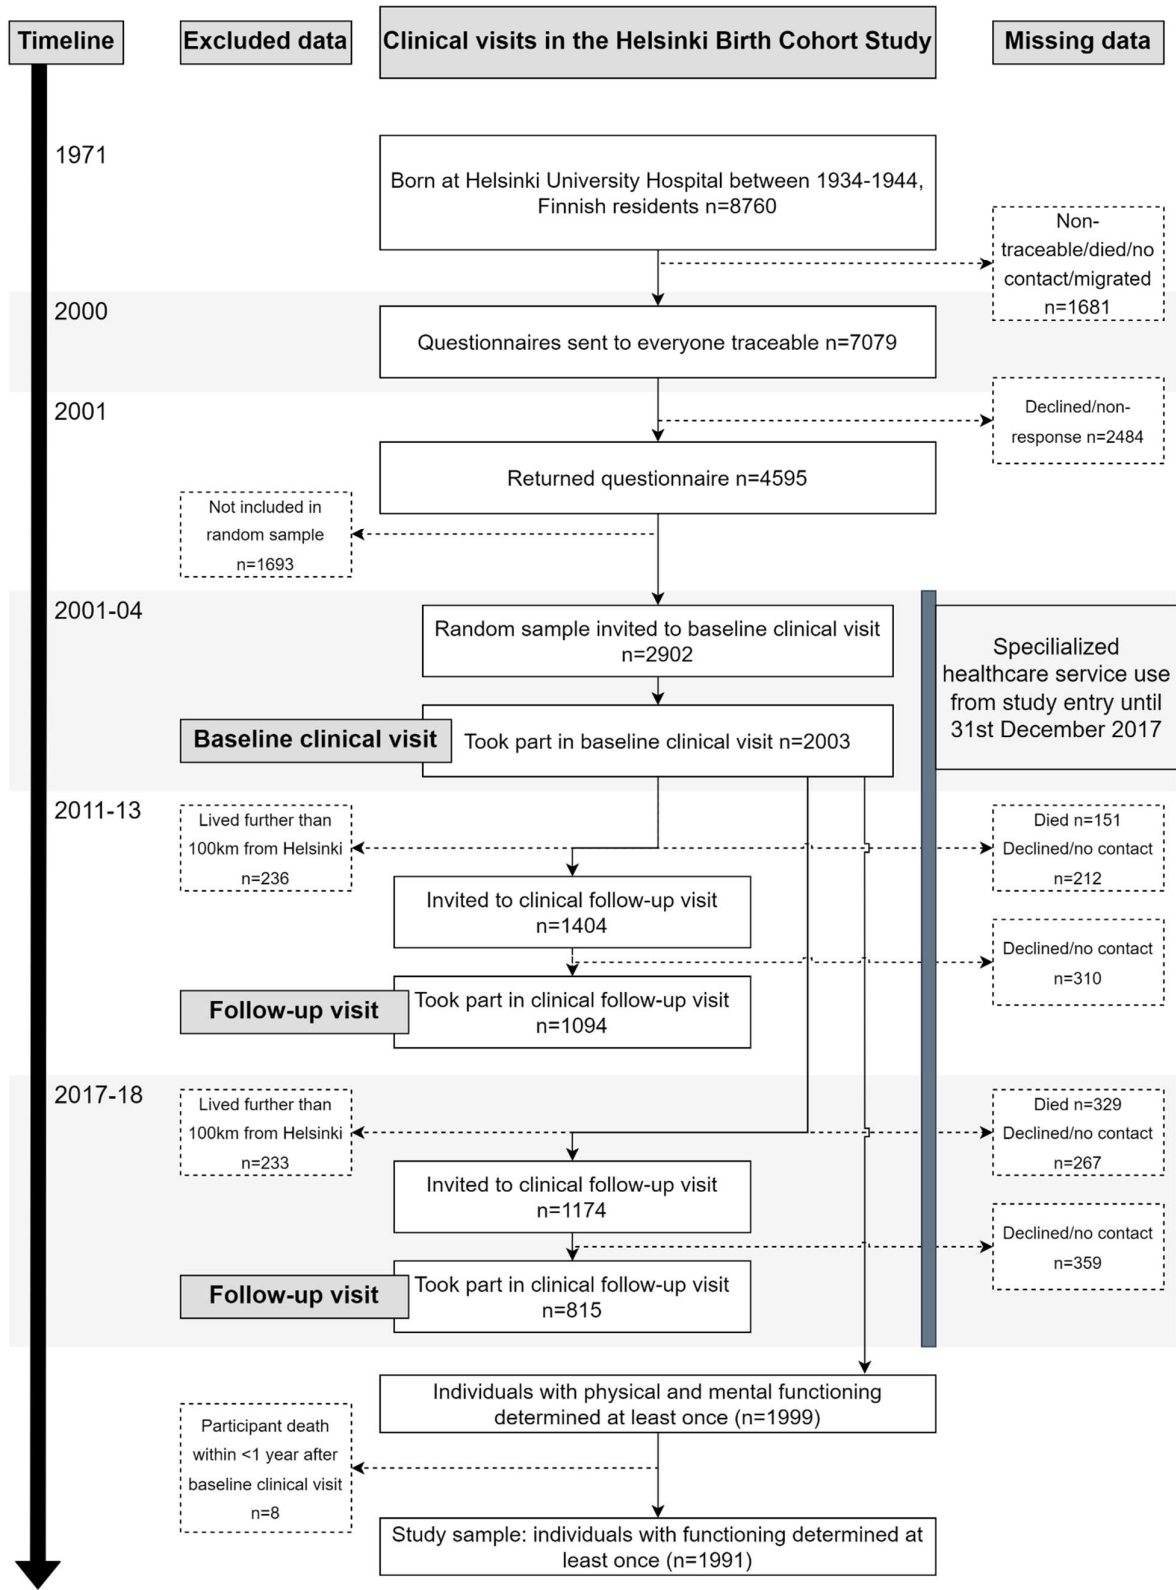

Supplementary Figure 1. Selection of the study participants.

# Physical Component Score (PCS)

## Men

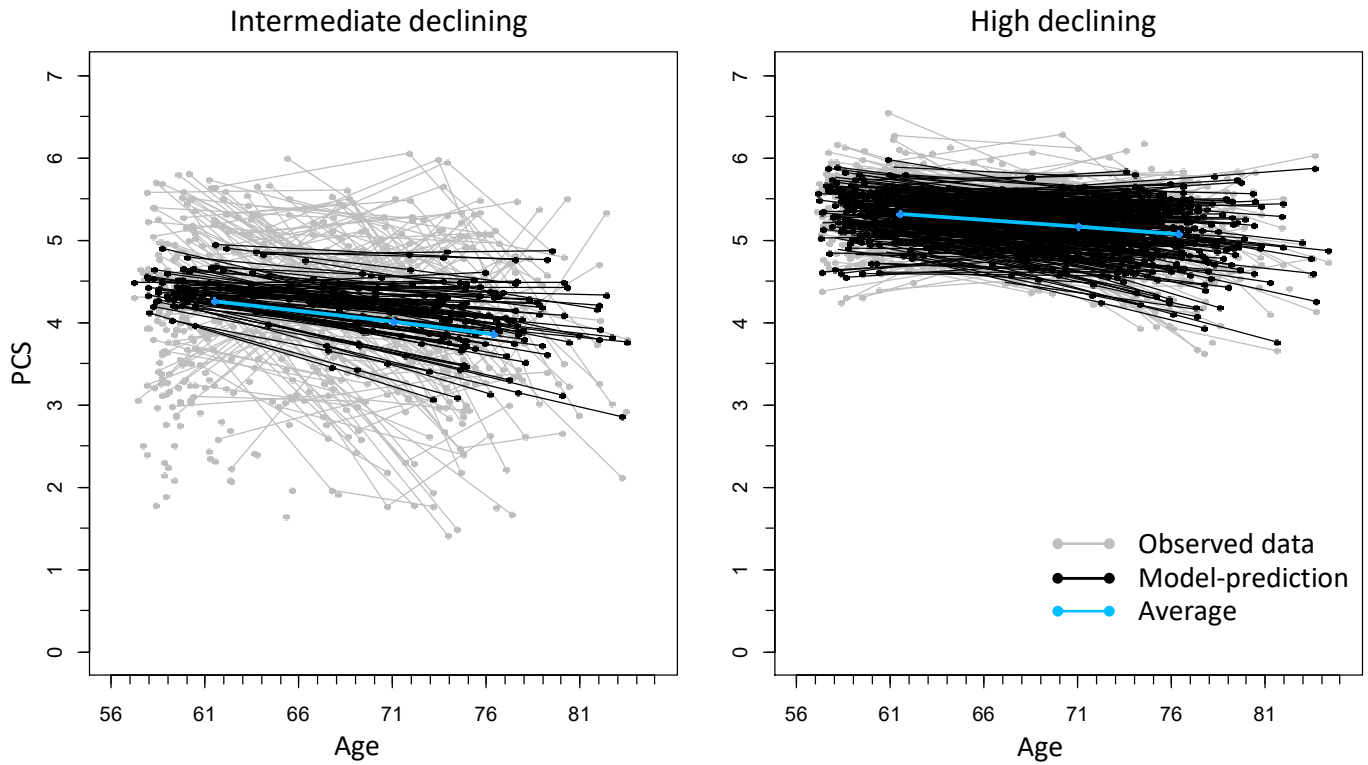

## Women

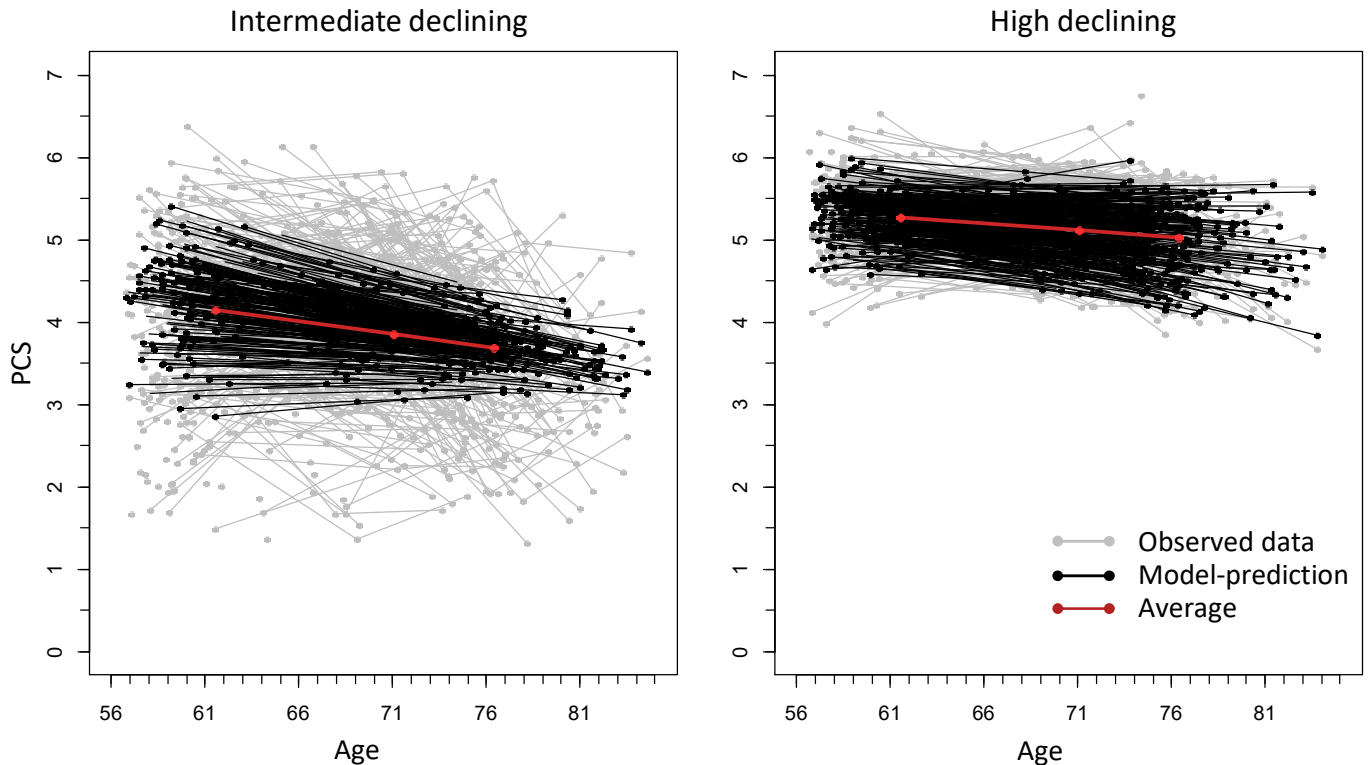

Supplementary Figure 2. Observed (gray line), model-expectation (black line) and average (blue line) model-based trajectories for physical component score (PCS) in the intermediate and high declining classes among men and women.

# Mental Component Score (MCS)

## Men

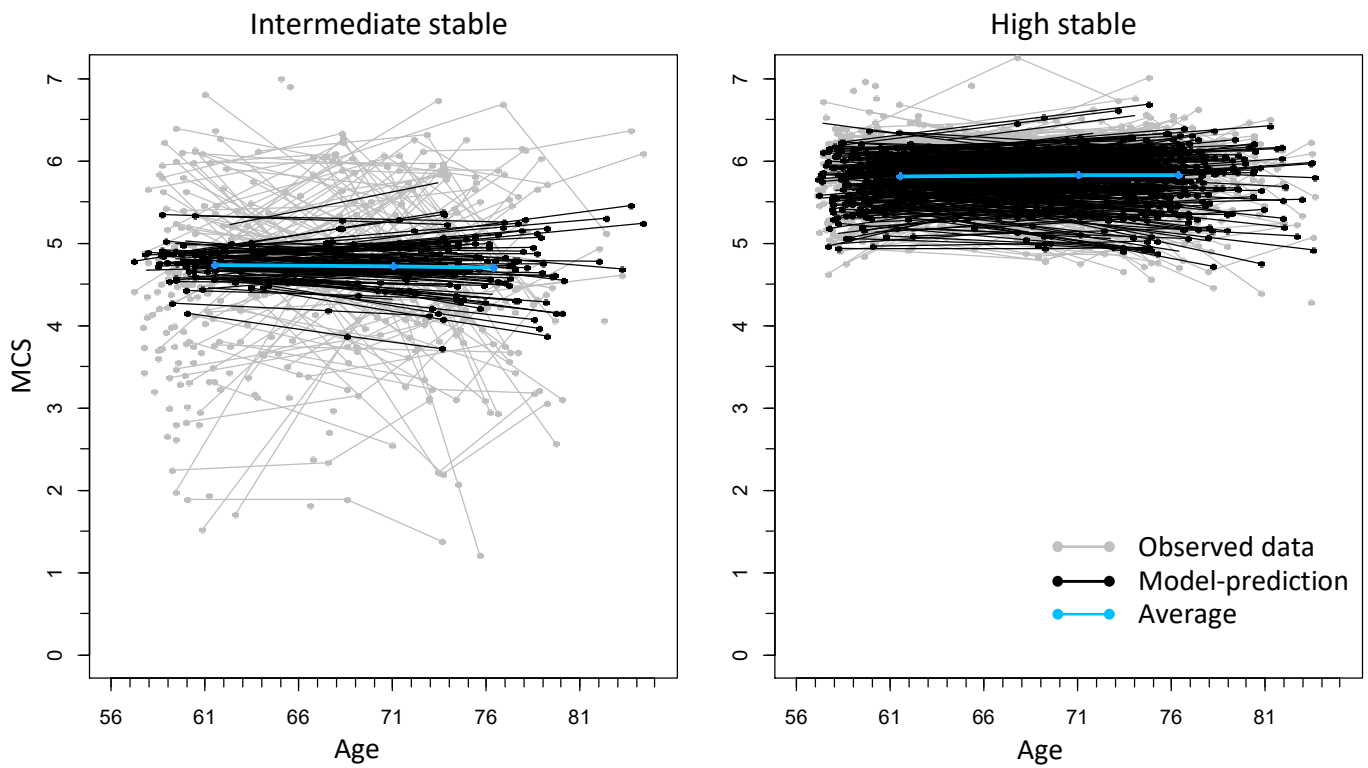

## Women

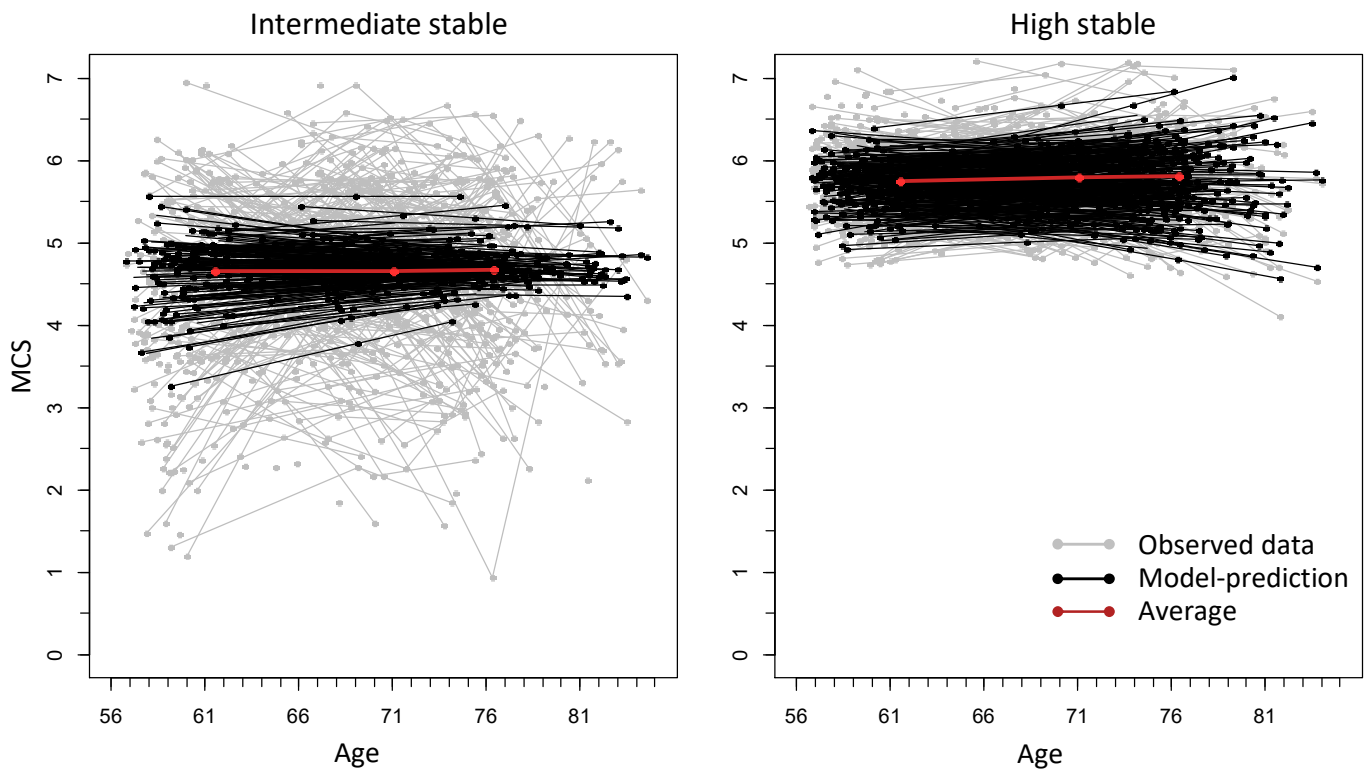

Supplementary Figure 3. Observed (gray line), model-expectation (black line) and average (blue line) model-based trajectories for mental component score (MCS) in the intermediate and high stable classes among men and women.
